# Supplementary material for: Prediction of Unplanned Hospitalizations in Older Patients Treated with Chemotherapy
Source: PubMed Central journal article supplement (PMC8004134; doi:10.3390/cancers13061437), 2021-03-22
Supplement: cancers-13-01437-s001.pdf [file cancers-13-01437-s001.pdf]

# Supplementary Materials: Prediction of Unplanned Hospitalizations in Older Patients Treated with Chemotherapy

Jaime Feliu, Enrique Espinosa, Laura Basterretxea, Irene Paredero, Elisenda Llabrés, Beatriz Jiménez-Munárriz, Beatriz Losada, Alvaro Pinto, Ana Belén Custodio, María del Mar Muñoz, Jeniffer Gómez-Mediavilla, María Dolores Torregrosa, Patricia Cruz, Oliver Higuera and María José Molina-Garrido

**Table S1.** Summary of Comprehensive Geriatric Assessment Domains and Elements.

| Domain               | Elements of Assessment                                 |
|----------------------|--------------------------------------------------------|
| Functional status    | ECOG performance status [25]                           |
|                      | Activities of daily living [29]                        |
|                      | Instrumental activities of daily living [30]           |
|                      | Physical performance test SPPB [26]                    |
|                      | Nº of falls in the last 6 months                       |
| Comorbidity          | Charlson index [24]                                    |
| Psychological status | Hospital Anxiety Scale [31]                            |
| Cognitive status     | Pfeiffer test [28]                                     |
| Social support       | MOS Social Support Survey [32]                         |
| Nutritional status   | Body mass index                                        |
|                      | Percent unintentional weight lost in the last 6 months |

Cut off levels of the recommended geriatric assessment: Functional status by activities of daily living (ADL): independent score 6 versus dependent score  $\leq 5$ . Instrumental activities of daily living (IADL): independent score 8/8 versus dependent score  $\leq 7$ . Physical performance test SPPB: riesgo de fragilidad score  $< 9/12$ . Presence of falls in the past 6 months: no falls versus at least one fall. Charlson index: 0-2 comorbidities versus comorbidities score  $\geq 2$ , Hospital Anxiety and Depression Scale: Scores of 0-7 in respective subscales are considered normal, with 8-10 borderline and 11 or over indicating clinical anxiety or depression. Pfeiffer test:  $\geq 3/10$  mistakes suggest cognitive impairment. MOS Social Support Survey 0-15/25 indica un apoyo social deficiente, y  $> 15/25$  un apoyo social adecuado.

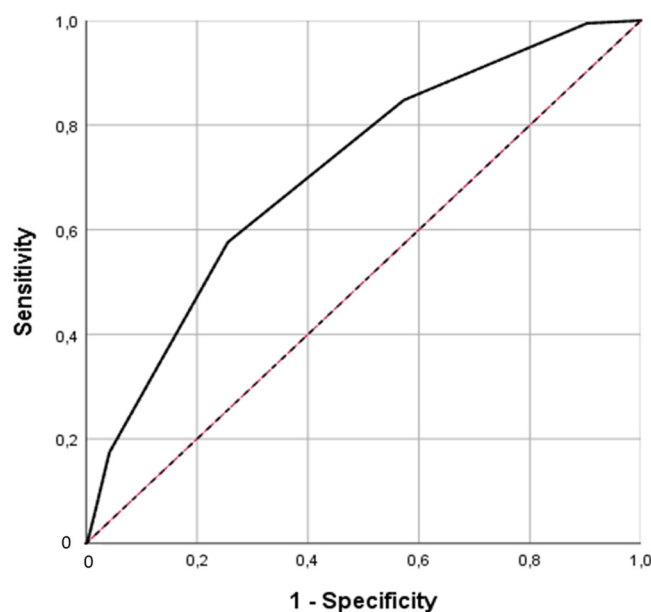

**Figure S1.** Receiver operating characteristic (ROC) analyses to assess the capacity of the prognostic score to predict 6-months unplanned hospitalizations.
